# Supplementary material for: The Effect of Chinese Medicine Compound in the Treatment of Rheumatoid Arthritis on the Level of Rheumatoid Factor and Anti-Cyclic Citrullinated Peptide Antibodies: A Systematic Review and Meta-Analysis
Source: Front Pharmacol. 2021 Jun 30;12:686360. doi: 10.3389/fphar.2021.686360 (PMC8278104; doi:10.3389/fphar.2021.686360)
Supplement: Supplementary file 2 [file DataSheet4.xlsx]

## Sheet: RF-FOLLOW-UP
Study	Year	Tsample	Tmean	Tsd	Csample	Cmean	Csd	Time(W)	T Intervention	C Intervention	Dosage forms
Wang,S.M. et al[1]	2006	40	82.2	6.82	20	106.8	10.26	36	MTX + SSZ + NSAIDs + CMC	MTX + SSZ + NSAIDs	decoction
Huang,G.D. et al[2]	2006	40	29.62	6.08	36	43.30	7.27	12	MTX + D-PEN(D-penicillamine) + CMC	MTX + D-PEN(D-penicillamine)	decoction
Li,S.W.[3]	2006	31	26.17	0.94	30	42.88	31.26	8	MTX + SSZ + CMC	MTX + SSZ	decoction
Liu,B. et al[4]	2007	30	63.23	54.23	30	98.64	155.53	12	MTX + CMC	MTX	decoction
Shen,Y.P. et al[5]	2008	30	130.4	128.6	10	133.2	112.8	12	GC + NSAIDs + CMC	GC + NSAIDs	decoction
Luo,Y.H.[6]	2008	32	86.68	72.06	28	135.48	124.02	12	CMC	MTX + SSZ + NSAIDs	decoction
Xiang,C.C. et al[7]	2009	40	56.64	21.14	40	86.25	68.2	12	MTX + SSZ + NSAIDs + CMC	MTX + SSZ + NSAIDs	decoction
Ma,W.K. et al[8]	2009	34	93.61	35.15	34	111.91	38.71	24	MTX + SSZ + NSAIDs + CMC	MTX + SSZ + NSAIDs	capsule
Li,A.M.[9]	2009	82	58.22	52.65	78	57.84	52.32	4	CMC	MTX + NSAIDs	decoction
Liu,X.D. et al[10]	2009	50	45.36	11.32	50	52.30	10.22	12	MTX + SSZ + NSAIDs + CMC	MTX + SSZ + NSAIDs	decoction
Zhou,C.Y. et al[11]	2010	60	76.19	48.66	60	82.15	55.56	24	CMC	MTX	decoction
Yao,J.H.[12]	2010	58	25.22	8.80	38	36.49	9.89	8	CMC	LEF + NSAIDs + placebo	decoction
Chen,Z.W. et al[13]	2010	45	99.12	10.13	45	97.01	13.12	24	CMC	MTX	decoction
Han,S.L. et al[14]	2011	35	45.36	11.32	35	52.30	10.22	12	MTX + SSZ + NSAIDs + CMC	MTX + SSZ + NSAIDs	decoction
Yang,B. et al[15]	2011	20	65.40	16.35	20	82.10	18.50	12	MTX + NSAIDs + CMC	MTX + NSAIDs	decoction
Shen, H.B. et al[16]	2011	40	37.43	17.51	40	43.41	23.47	12	CMC	MTX + NSAIDs	decoction
Li,Z.L. et al[17]	2012	30	133.88	208.80	31	176.69	371.04	12	CMC	Alfacalcidol capsule + caltrate D tablet	decoction
Li,J.P.[18]	2013	40	71.25	45.26	40	88.74	52.11	12	LEF + CMC	LEF	decoction
Yang,Y.J.[19]	2013	42	26.98	17.56	38	42.56	20.34	6	CMC	LEF + NSAIDs + Thymosins	powder
Wei,Y. et al[20]	2013	50	70.24	46.25	50	88.79	55.11	16	LEF + SSZ + NSAIDs + CMC	LEF + SSZ + NSAIDs	decoction
Wei,W. et al[21]	2013	45	23.2	10.1	45	34.2	12.5	12	MTX + HCQ + NSAIDs + TNFi + CMC	MTX + HCQ + NSAIDs + TNFi(TNF-α inhibitor)	decoction
Liu,E.C. et al[22]	2013	50	76.31	42.12	50	79.86	53.62	12	CMC	MTX	capsule
Cao,Y.H. et al[23]	2014	31	33.03	6.98	31	42.19	7.47	12	LEF + NSAIDs + CMC	LEF + NSAIDs	capsule
Yu,M. et al[24]	2014	32	38.7	11.9	32	43.7	13.6	12	MTX + SSZ + NSAIDs + CMC	MTX + SSZ + NSAIDs	decoction
Niu,J.H.[25]	2014	31	70	2.15	30	78	2.32	14	MTX + CMC	MTX	decoction
Zhang,H.J. et al[26]	2014	30	78.7	84.3	30	155.8	143.9	12	NSAIDs + CMC	NASIDs	decoction
He,D.C. et al[27]	2014	30	140.58	40.45	30	169.14	45.61	12	MTX + LEF + CMC	MTX + LEF	decoction
Wang,Z. et al[28]	2014	47	66.87	72.48	41	124.65	134.78	12	MTX + LEF + CMC	MTX + LEF	decoction
Li,Y. et al[29]	2015	29	9.45	7.10	30	5.47	4.48	12	CMC	LEF	decoction
Zhao,F.C.[30]	2015	55	85.67	31.98	55	132.68	96.36	9	MTX + GC + CMC	MTX + GC	decoction
Zheng,X.B. et al[31]	2015	80	45.18	20.22	80	47.71	23.50	12	MTX + CMC	MTX	capsule
Shu,C. et al[32]	2015	22	149.05	104.5	20	165.16	131.42	12	CMC	MTX + LEF	decoction
Su,S.Z. et al[33]	2015	34	57.3	37.1	36	95.8	58.3	NR	MTX + LEF + NSAIDs + CMC	MTX + LEF +NSAIDs	decoction
Liu,Y. et al[34]	2016	35	20.20	4.68	30	24.17	4.11	4	MTX + LEF + CMC	MTX + LEF	decoction
Jiang,D. et al[35]	2016	44	76.4	75.6	44	213.5	111.4	24	LEF + CMC	LEF	decoction
Jia,F.Y. et al[36]	2016	62	72.48	25.11	58	108.16	37.49	8	LEF + NSAIDs + CMC	LEF + NSAIDs	decoction
Han,L. et al[37]	2016	96	12.34	4.45	90	18.43	7.47	4	LEF + GC + CMC	LEF + GC	decoction
Qian,X. et al[38]	2016	47	67.6	47.2	45	124.6	92.5	12	NSAIDs + CMC	NASIDs	decoction
You,B.R. et al[39]	2016	43	13.89	4.87	43	22.03	6.08	24	MTX + CMC	MTX	decoction
Chen,F. et al[40]	2016	35	43.31	20.87	35	55.57	23.43	8	MTX + LEF + NSAIDs + CMC	MTX + LEF + NSAIDs	capsule
Guo,H.M. et al[41]	2017	340	219	97	300	249	95	12	CMC + NSAIDs	MTX + NSAIDs	capsule
Li,J. et al[42]	2017	67	125.2	11.9	67	164.8	15.6	16	MTX + NSAIDs + CMC	MTX + NSAIDs	decoction
Pang,A.M. et al[43]	2017	39	122.58	350.77	39	258.26	371.09	12	MTX + NSAIDs + CMC	MTX + NSAIDs	decoction
Wang,H.T.[44]	2017	40	461.36	13.19	40	634.61	13.47	4	CMC	LEF + NSAIDs	decoction
Wang,Y. et al[45]	2017	52	50.1	25.8	52	87.3	26.9	12	MTX + LEF + CMC	MTX + LEF	decoction
Gao,D. et al[46]	2017	60	16.12	6.02	60	29.33	8.08	12	MTX + CMC	MTX	decoction
Bian,Z.Q. et al[47]	2018	84	60.87	39.56	79	80.75	44.27	12	NSAIDs + CMC	NASIDs	decoction
Shi,L. et al[48]	2018	40	35.28	15.41	38	51.47	21.55	8	NSAIDs + CMC	NASIDs	decoction
Ge,S.[49]	2018	46	20.3	5.6	46	14.3	3.5	12	MTX + NSAIDs + CMC	MTX + NSAIDs	decoction
Hu,H.[50]	2018	43	65.34	126.34	43	134.58	156.27	8	MTX + CMC	MTX	decoction
Mang,Z.L. et al[51]	2018	25	1.99	1.03	25	2.45	1.32	6	MTX + NSAIDs + CMC	MTX + NSAIDs	decoction
Xu,G.S. et al[52]	2018	38	149.44	23.55	38	169.03	30.68	12	MTX + LEF + NSAIDs + CMC	MTX + LEF + NSAIDs	decoction
Zeng,J.Y. et al[53]	2018	40	72.83	41.07	40	180.71	125.05	8	MTX + HCQ + NSAIDs + CMC	MTX + HCQ +NSAIDs	tablet
Guo,H.L. et al[54]	2018	40	30.02	13.32	40	38.60	17.62	12	MTX + CMC	MTX	pill
Li,J.H. et al[55]	2019	40	65.32	13.01	39	82.20	15.89	12	MTX + NSAIDs + CMC	MTX + NSAIDs	decoction
Yuan,L. et al[56]	2019	15	94.95	52.73	15	143.46	73.25	12	MTX + NSAIDs + CMC	MTX + NSAIDs	decoction
Song,W.H. et al[57]	2019	66	73.25	8.34	66	84.37	10.61	12	MTX + CMC	MTX	decoction
Fang,X.G. et al[58]	2019	57	28.34	12.44	57	39.47	11.59	12	LEF + NSAIDs + CMC	LEF + NSAIDs	decoction
Zhang,K.L.[59]	2019	47	22.8	6.5	47	38.5	5.7	24	MTX + LEF + CMC	MTX + LEF	decoction
Pang,J. et al[60]	2019	31	84	40	31	112	63	24	MTX + NSAIDs + CMC	MTX + NSAIDs	decoction
Zhao,L.[61]	2019	30	135.61	59.30	30	176.41	53.55	8	MTX + CMC	MTX	decoction
Jiang,P. et al[62]	2020	55	110.21	28.76	55	186.57	40.27	12	MTX + SSZ + NSAIDs + CMC	MTX + SSZ + NSAIDs	decoction
Cao,M.Z. et al[63]	2020	41	62.28	36.07	41	117.59	89.43	12	MTX + CMC	MTX	decoction

## Sheet: RF-BASELINE
Study	Year	Tsample	Tmean	Tsd	Csample	Cmean	Csd
Wang,S.M. et al[1]	2006	40	136.4	22.8	20	124.22	8.68
Huang,G.D. et al[2]	2006	40	47.32	7.55	36	52.85	6.91
Li,S.W.[3]	2006	31	71.96	34.61	30	71.82	35.19
Liu,B. et al[4]	2007	30	196.16	205.19	30	198.27	200.05
Shen,Y.P. et al[5]	2008	30	143	150	10	138.5	134.7
Luo,Y.H.[6]	2008	32	206.26	176.63	28	182.54	134.16
Xiang,C.C. et al[7]	2009	40	186.32	78.64	40	182.54	65.78
Ma,W.K. et al[8]	2009	34	196.73	63.56	34	190.65	61.78
Li,A.M.[9]	2009	82	195.14	203.19	78	194.87	205.08
Liu,X.D. et al[10]	2009	50	115.02	25.82	50	114.61	26.8
Zhou,C.Y. et al[11]	2010	60	77.84	47.45	60	78.49	48.52
Yao,J.H.[12]	2010	58	65.25	11.64	38	64.31	10.99
Chen,Z.W. et al[13]	2010	45	47.02	21.91	45	155.01	12.21
Han,S.L. et al[14]	2011	35	115.02	25.82	35	114.61	26.8
Yang,B. et al[15]	2011	20	95.8	20.25	20	98.1	18.4
Shen, H.B. et al[16]	2011	40	129.22	82.99	40	118.66	109.53
Li,Z.L. et al[17]	2012	30	160.65	254.64	31	180.61	398.83
Li,J.P.[18]	2013	40	168.52	111.26	40	169.15	116.95
Yang,Y.J.[19]	2013	42	122.56	37.58	38	123.23	16.92
Wei,Y. et al[20]	2013	50	168.62	118.28	50	169.11	116.93
Wei,W. et al[21]	2013	45	49.6	15.2	45	50.1	16.2
Liu,E.C. et al[22]	2013	50	78.92	43.26	50	77.8	46.52
Cao,Y.H. et al[23]	2014	31	91.87	15.74	31	90.1	12.93
Yu,M. et al[24]	2014	32	92.3	14.4	32	90.8	13.9
Niu,J.H.[25]	2014	31	112	2.01	30	113	2.12
Zhang,H.J. et al[26]	2014	30	456.9	233.5	30	451.5	221.7
He,D.C. et al[27]	2014	30	208.67	62.45	30	219.14	63.5
Wang,Z. et al[28]	2014	47	234.25	260.52	41	255.39	276.97
Li,Y. et al[29]	2015	29	288.83	212.25	30	238.23	107.84
Zhao,F.C.[30]	2015	55	159.8	98.78	55	163.35	102.45
Zheng,X.B. et al[31]	2015	80	97.05	30.24	80	96.86	32.09
Shu,C. et al[32]	2015	22	205.95	126.48	20	195.75	153.45
Su,S.Z. et al[33]	2015	34	122.2	86	36	115.9	80.6
Liu,Y. et al[34]	2016	35	73.74	7.46	30	75.97	6.49
Jiang,D. et al[35]	2016	44	445.3	212.1	44	446.2	216.3
Jia,F.Y. et al[36]	2016	62	201.15	59.42	58	189.03	55.8
Han,L. et al[37]	2016	96	34.32	13.64	90	35.85	12.85
Qian,X. et al[38]	2016	47	354.6	132.5	45	346.1	121.3
You,B.R. et al[39]	2016	43	47.69	9.43	43	48.13	9.12
Chen,F. et al[40]	2016	35	85.18	29.54	35	84.85	30.71
Guo,H.M. et al[41]	2017	340	294	170	300	295	175
Li,J. et al[42]	2017	67	247.8	25.6	67	251.3	24.5
Pang,A.M. et al[43]	2017	39	336.7	660.26	39	357.21	516.22
Wang,H.T.[44]	2017	40	753.64	15.05	40	755.49	12.54
Wang,Y. et al[45]	2017	52	239.2	74.7	52	242.1	68.2
Gao,D. et al[46]	2017	60	50.11	10.12	60	49.89	11.3
Bian,Z.Q. et al[47]	2018	84	264.92	93.62	79	257.92	89.66
Shi,L. et al[48]	2018	40	54.94	23.33	38	56.43	23.53
Ge,S.[49]	2018	46	81.5	30.5	46	81.4	28.6
Hu,H.[50]	2018	43	398.64	18.36	43	402.51	19.45
Mang,Z.L. et al[51]	2018	25	3.36	1.12	25	3.21	1.24
Xu,G.S. et al[52]	2018	38	333.56	37.06	38	337.37	41.62
Zeng,J.Y. et al[53]	2018	40	441.38	213.06	40	443.43	200.05
Guo,H.L. et al[54]	2018	40	122.72	65.58	40	112.6	55.85
Li,J.H. et al[55]	2019	40	225.11	24.78	39	223.92	25.21
Yuan,L. et al[56]	2019	15	226.57	102.32	15	227.91	124.72
Song,W.H. et al[57]	2019	66	143.18	15.2	66	139.62	15.08
Fang,X.G. et al[58]	2019	57	56.24	15.32	57	55.29	14.78
Zhang,K.L.[59]	2019	47	62.5	7.2	47	60.5	6.8
Pang,J. et al[60]	2019	31	171.77	79.08	31	175.73	80.64
Zhao,L.[61]	2019	30	284.61	81.72	30	270.37	71.41
Jiang,P. et al[62]	2020	55	476.89	89.45	55	477.12	89.77
Cao,M.Z. et al[63]	2020	41	346.87	113.83	41	348.08	112.26

## Sheet: CCP-FOLLOW-UP
Study	Year	Tsample	Tmean	Tsd	Csample	Cmean	Csd	Time	T Intervention	C Intervention	Dosage forms
Liu,X.D. et al[10]	2009	50	42.62	7.31	50	45.77	7.12	12	MTX + SSZ + NSAIDs + CMC	MTX + SSZ + NSAIDs	decoction
Chen,Z.W. et al[13]	2010	45	0.22	0.45	45	0.21	0.35	24	CMC	MTX	decoction
Han,L. et al[37]	2016	96	17.45	6.46	90	25.67	8.74	12	LEF + GC + CMC	LEF + GC	decoction
Pang,A.M. et al[43]	2017	39	331.08	109.26	39	416.89	213.72	12	MTX + NSAIDs + CMC	MTX + NSAIDs	decoction
Gao,D. et al[46]	2017	60	273.01	32.01	60	300.89	37.22	12	MTX + CMC	MTX	decoction
Bian,Z.Q. et al[47]	2018	84	24.88	17.06	79	38.04	20.39	12	NSAIDs + CMC	NSAIDs	decoction
Pang,J. et al[60]	2019	31	78	29	31	93	39	24	MTX + NSAIDs + CMC	MTX + NSAIDs	decoction
Li,D.[64]	2020	60	196.72	83.37	60	233.43	96.34	12	MTX + SSZ + NSAIDs + CMC	MTX + SSZ + NSAIDs	decoction

## Sheet: CCP-BASELINE
Study	Year	Tsample	Tmean	Tsd	Csample	Cmean	Csd
Liu,X.D. et al[10]	2009	50	101.26	21.43	50	98.85	20.54
Chen,Z.W. et al[13]	2010	45	0.25	0.45	45	0.23	0.56
Han,L. et al[37]	2016	96	38.23	14.28	90	38.12	13.07
Pang,A.M. et al[43]	2017	39	650.26	522.26	39	611.67	516.9
Gao,D. et al[46]	2017	60	398.41	20.55	60	399.82	26.88
Bian,Z.Q. et al[47]	2018	84	96.58	37.25	79	95.86	36.57
Pang,J. et al[60]	2019	31	181.67	66.21	31	183.37	71.67
Li,D.[64]	2020	60	493.37	210.21	60	473.58	204.64

## Sheet: References
No.	References
[1]	Wang SM, Wang X, Gong Q: Observation of 40 cases of rheumatoid arthritis treated by combination of Traditional Chinese and Western medicine. Journal of Sichuan of Traditional Chinese Medicine 2006:47-48.
[2]	Huang GD, Li JB, Huang DF, Huang YH, Xiao MZ, Tang LJ, Zhang SX: Observation on effect of Centipede Longsnake Decoction combined with Western medicine in treating rheumatoid arthritis. Chinese Journal of Clinical Rehabilitation 2006:186-187.
[3]	Huang GD, Li JB, Huang DF, Huang YH, Xiao MZ, Tang LJ, Zhang SX: Observation on effect of Centipede Longsnake Decoction combined with Western medicine in treating rheumatoid arthritis. Chinese Journal of Clinical Rehabilitation 2006:186-187.
[4]	Liu B, Liu W, Wang Y: Siwu Decoction combined with methotrexate attenuated and effective treatment for rheumatoid arthritis. Chinese Journal of Integrative Medicine 2007, 27.
[5]	Shen YP, Chuan XW, Liu Y: Effect of Ziyin YiQi Decoction on hormone withdrawal in rheumatoid arthritis. Shandong Journal of Traditional Chinese Medicine 2008:95-96.
[6]	Luo YH: 32 cases of senile rheumatoid arthritis were treated with Jianpi Yiqi Huoxue Decoction. Shaanxi J Tradit Chin Med 2008:997-999.
[7]	Shen YP, Chuan XW, Liu Y: Effect of Ziyin YiQi Decoction on hormone withdrawal in rheumatoid arthritis. Shandong Journal of Traditional Chinese Medicine 2008:95-96.
[8]	Ma WK, Zhong Q, Liu ZQ, Yao XM: Clinical study on the treatment of rheumatoid arthritis by Sanwu capsule combined with methotrexate and salazosulphapyridine. Journal of New Chinese Medicine 2009, 41:42-44.
[9]	Li AM: Siteng Yin and Siwu Tang were used to treat 160 cases of rheumatoid arthritis. Chinese ethnic and folk medicine 2009, 18:51-52.
[10]	Liu XD, Zhang JL, Ye LH, Liu FY, Chen Y: Effect of Wenhua Juanbi Decoction on TNF and IL-1 in peripheral blood of patients with rheumatoid arthritis. Chinese Journal of Integrative Medicine 2009, 29:787-790.
[11]	Zhou CY, Tang JY, Fang DY, Pan Z, Ma F: A clinical study on Simiao Xiaobi Decoction in the treatment of rheumatoid arthritis in active stage. Chinese Journal of Integrative Medicine 2010, 30:275-279.
[12]	Yao JH: Clinical observation of 58 cases of rheumatoid arthritis treated by Rebi Decoction. Journal of Traditional Chinese Medicine 2010, 51:1086-1088.
[13]	Chen ZW, Sun J, Li YM, Chen YQ: [Efficacy of Shenshi Qianghuo Dihuang Decoction in rheumatoid arthritis: a randomized controlled trial]. Zhong Xi Yi Jie He Xue Bao 2010, 8:35-39.
[14]	Han SL, Song YW: A randomized controlled study of Huatan Quyu Juanbi Decoction in the treatment of rheumatoid arthritis. Chinese Archives of Traditional Chinese Medicine 2011, 29:2808-2810.
[15]	Yang B, Liang QH, Wu D, Tang T, Peng WJ: Clinical observation of Simiao Pill combined with Western medicine in treating 20 cases of active rheumatoid arthritis. Journal of Traditional Chinese Medicine 2011, 52:1566-1569.
[16]	Shen HB, Bai YJ, Huo ZJ, Li WN, Tang XP: Assessment of clinical effect of therapy combining disease with syndrome on rheumatoid arthritis. Journal of Traditional Chinese Medicine 2011, 31:39-43.
[17]	Li ZL, Wang RS, Shen J, Xu LM, Yue T, Zhu Q, Jiang T, He DY: Effect of tonifying kidney and removing blood stasis on bone metabolism in patients with early rheumatoid arthritis. Journal of Traditional Chinese Medicine 2012, 53:215-218.
[18]	Li JP: Clinical analysis of 40 cases of rheumatoid arthritis treated by combination of Chinese and Western medicine. Journal of Sichuan of Traditional Chinese Medicine 2013, 31:86-88.
[19]	Yang YJ: Treatment of 42 cases of rheumatoid arthritis with Compound Maqianzi Powder. China pharmaceutical 2013, 22:84-85.
[20]	Wei Y, Yang XM, Wang SE: Clinical observation of 50 cases of active rheumatoid arthritis treated by combination of Chinese and Western medicine. Science and Technology of Chinese Traditional Medicine 2013, 20:54-55.
[21]	Wei W, Liu KK: Clinical Observation of Traditional Chinese Medicine Combined with Etanercept in Treatment of Elderly Rheumatoid Arthritis. Chinese Archives of Traditional Chinese Medicine 2013, 31:939-941.
[22]	Liu EC, Liu Y, Wang SH, Wang SF: Clinical observation on the treatment of rheumatoid arthritis with Yaotongning Capsule. Clinical Journal of Traditional Chinese Medicine 2013, 25:109-111.
[23]	Cao YH, Liu J: Clinical observation of heat clearing and wetting combined with Western medicine in the treatment of dampness-heat type rheumatoid arthritis. Journal of Anhui University of Chinese Medicine 2014, 33:19-22.
[24]	Yu M, Chen YY: Observation on effect of integrated Chinese medicine and western medicine on 32 pafients with rheumatoid arthritis. Internal Medicine of China 2014, 9:12-14.
[25]	Niu JH: Observation on the curative effect of Guizhi Shaoyao Zhimu Decoction combined with Juanbi Decoction in treating rheumatoid arthritis. Shaanxi J Tradit Chin Med 2014, 35:984-986.
[26]	Zhang HJ, Chen TB: Clinical observation of Duhuo Qushi Zhitong Decoction combined with meloxicam in treatment of rheumatoid arthritis. Shaanxi J Tradit Chin Med 2014:1336-1338.
[27]	He DC, Xiao JJ: Clinical efficacy and safety of Bizhengning in the treatment of rheumatoid arthritis. Modern Journal of Integrated Traditional Chinese and Western Medicine 2014, 23:3090-3092.
[28]	Wang Z, Tao XJ: [Treatment of rheumatoid arthritis by Yangxue Tongluo Recipe combined with immunosuppressive agents: a clinical observation]. Zhongguo Zhong Xi Yi Jie He Za Zhi 2014, 34:276-278.
[29]	Li Y, Fan WM, Gu SF, Liu WH: Clinical observation of Yishen Qingluo Huoxue Decoction in treating rheumatoid arthritis with Mutual junction of phlegm and blood stasis. Journal of Anhui University of Chinese Medicine 2015, 34:17-20.
[30]	Zhao FC: Observation on the curative effect of combined Chinese and Western medicine on rheumatoid arthritis. Modern Journal of Integrated Traditional Chinese and Western Medicine 2015, 24:2107-2109.
[31]	Zheng XB, Shi CH: Zhuithmg Tougu Capsules combined with Methotmxate on the Treatment of Rheumatoid Arthritis for 80 Cases. Chinese medicine modern distance education 2015, 13:63-65.
[32]	Shu C, Hua DP, Li Y: Clinical Observation on Yishen Qingluo Huoxue Decoction in Treatment of Intermingled Phlegm and Blood Stasis Type of Rheumatoid Arthritis. Chinese Archives of Traditional Chinese Medicine 2015, 33:34-37.
[33]	Su SZ, Ye XY, Peng JH, Chen B: Clinical observation on treating rheumatoid arthritis by Bushen Huoxue therapy. Clinical Journal of Chinese Medicine 2015:18-20.
[34]	Liu Y, Zhang HJ, Guo YX, Meng QL: Clinical Observation of 35 Cases of Ｒheumatoid Arthritis of Damp Heat Type Treated with Simiao Podwer combined with Xuanbi Decoction and Western Medicine. World Journal of Integrated Traditional and Western Medicine 2016, 11:800-803.
[35]	Jiang D, Wu J: Analysis and evaluation of the curative effect of Self-prepared Chinese medicine combined with anti-rheumatism medicine on active rheumatoid arthritis. J Mod Med Health 2016, 32:3507-3510.
[36]	Jia FY, Wang J, Yang QB: A clinical study on treatment of rheumatoid arthritis by eliminating rheum bnourishing the liver and yishen decoction. Asia-Pacific Traditional Medicine 2016, 12:143-144.
[37]	Han L, Ba Y, Gu JNTH, Shi R, Ba HEGL, Wei R: Effect of removing wind, dehumidifying and tonifying kidney in the treatment of senile rheumatoid arthritis and the influence of antibody levels against cyclic citrulline polypeptide, rheumatoid factor, erythrocyte sedimentation rate, C-reactive protein and keratin. Chinese Journal of Gerontology 2016, 36:4558-4560.
[38]	Qian X, Chen X, Wei G, Guo YK, Sun ZL: Clinical Effect of Duhuo Jisheng Decoction Combined with Meloxicam in Treatment of Rheumatoid Arthritis. Chinese Journal of Experimental Traditional Medical Formulae 2016, 22:173-176.
[39]	You BR, Tian XW, Liu CJ: Clinical observation of Liuwei Dihuang combined with Siwu Decoction combined with methotrexate in the treatment of rheumatoid arthritis. Guiding Journal of TCM 2016, 22:95-97.
[40]	Chen F, Min CH, Zhou Y, Zhang HY: Clinical observation of 35 cases of Rheumatoid arthritis of Kidney Qi deficiency and Cold type treated by Yishen Juanbi Capsule combined with Western medicine. Journal of Traditional Chinese Medicine 2016, 57:1045-1048.
[41]	Guo HM, Guo LW, Xing JY: Clinical observation on 340 cases of Rheumatoid arthritis treated by Mayi Tongbi Capsule. World Chinese Medicine 2017, 12:1859-1862.
[42]	Li J, Rong B, Jia J, Pan MZ: Effect of Modified Juanbi Decoction on Inflammatory Factors and Serum MMP-3，OPG and ＲANKL in Synovial Fluid of Patients with Wind-cold-wetness Type Ｒheumatoid Arthritis. Chinese Journal of Experimental Traditional Medical Formulae 2017, 23:165-170.
[43]	Pang AM, Jiang P, Li JX, Chi XW: Effects of Hebi Formula on bone erosion in early rheumatoid arthritis of liver and spleen disorder type. Chinese Journal of Traditional Chinese Medicine 2017, 32:5682-5685.
[44]	Wang HT: Clinical research on treating rheumatoid arthritis by the Buyi Qixue, Qushi Tongluo therapy. Clinical Journal of Chinese Medicine 2017, 9:62-63.
[45]	Wang Y, Tu SH: Clinical Study on Jiawei Wutou Decoction in Treatment of Rheumatoid Arthritis. ACTA Chinese Medicine 2017, 32:1716-1719.
[46]	Gao D, Bu SS: Clinical Research on Liuwei Dihuang Decoction combined with Siwu Decoction Treatment of Rheumatoid Arthritis. ACTA Chinese Medicine 2017, 32:1079-1081.
[47]	Bian ZQ, Wang YD: Wenyang Chushi, Huatan tongluo prescription combined with conventional therapy to treat 90 cases of cold and dampness bizu rheumatoid arthritis. Global Chinese Medicine 2018, 11:447-450.
[48]	Shi L, Yang F: 40 cases of rheumatoid arthritis were treated by renal differentiation. Journal of Shaanxi University of Traditional Chinese Medicine 2018, 041:66-69.
[49]	Ge S: Observation on the curative effect of combined Chinese and Western medicine on rheumatoid arthritis. Journal of Practical Traditional Chinese Medicine 2018, 34:1371-1372.
[50]	Hu H: Short-term and Long-term Effects of Applying Traditional Chinese Medicine Syndrome Differentiation Combined with Methotrexate in the Treatment of Ｒheumatoid Arthritis. Journal of Sichuan of Traditional Chinese Medicine 2018, 36:76-79.
[51]	Ma ZL, Wang CY, Liu BB: Clinical observation of Buyang Huanwu Decoction in treating phlegm and blood stasis type rheumatoid arthritis. Modern Journal of Integrated Traditional Chinese and Western Medicine 2018, 27:1313-1315.
[52]	Xu GS, Yu XF, Kong MZ, Chen JC, Qiu MS: Clinical observation on the treatment of rheumatoid arthritis with heat and blood stasis by traditional Chinese medicine therapy of clearing heat and activating blood circulation. Chinese Journal of Traditional Chinese Medicine 2018, 33:1167-1170.
[53]	Zeng JY, Chen SK: The clinical effect of traditional Chinese medicine combined with antirheumatic drugs on rheumatoid arthritis. Clinical Journal of Chinese Medicine 2018, 10:82-83.
[54]	Guo HL, Wang G, Tian JX: Gulao Yukang Pills combined with methotrexate tablets in the treatment of 40 cases of rheumatoid arthritis. TCM Res 2018, 31:23-26.
[55]	Li JH, Lin YB, Yu GS, Zhang SX, Liu YY, Xu HB: Clinical Observation on Treating 41 Cases of Rheumatoid Arthritis of Mixed Heat and Cold Type with Guizhi Shaoyao Zhimu Tang Combined with Methotrexate. Rheumatism and Arthritis 2019, 8:31-34.
[56]	Yuan L, Wu JY, Tang J, Chen YG, Zhang ZY: Clinical Observation of Baihu Plus Guizhi Decoction Combined with Western Medicine in Treating Rheumatoid Arthritis with Rheumatic Heat Arthralgia Syndrome. Journal of Liaoning university of TCM 2019, 21:168-171.
[57]	Song WH, Li Q, Wang FZ, Tao WX, Guan QCR: Effects of Wenyang Bushen Method on the Levels of Serum 25 Hydroxyvitamin D3 in Patients with Plateau Rheumatoid Arthritis. World Chinese Medicine 2019, 14:1466-1470.
[58]	Fang XG, Wang M, Chen HY, Bai ZX, Chen ZF, Lan PM: Self-designed tongluo powder combined with Leflumide in the treatment of wind-cold and rheumatism type rheumatoid arthritis and its effect on serum WNT-3 and BMP-2 levels. Modern Journal of Integrated Traditional Chinese and Western Medicine 2019, 28:1408-1411.
[59]	Zhang KL: Research on the Clinical Effect of Integrated Chinese and Western Medicinesin Treatment of 47 Cases of Rheumatoid Arthritis. Chinese ethnic and folk medicine 2019, 28:83-85.
[60]	Pang J, Xu J, Li L, LI YL: Clinical study of Guikun Fengshi Mixture combined with methotrexate in the treatment of rheumatoid arthritis. Pharmacol Clin Chin Mater Med 2019, 35:155-158.
[61]	Zhao L: Clinical efficacy of the Guizhi Shaoyao Zhimu decoction on rheumatoid arthritis of the Fenghan Shibi type. Clinical Journal of Chinese Medicine 2019, 11:51-53.
[62]	Jiang P, Ma LJ: Clinical Study on the Treatment of Rheumatoid Arthritis by Removing Phlegm and Removing Blood Stasis. China Continuing Medical Education 2020, 12:158-160.
[63]	Cao MZ, Wang ZL, Jiang XS: Clinical Efficacy of Modified Duhuo Jisheng Decoction Combined with Methotrexate in Treatment of Patients with Rheumatoid Arthritis of Active Stage. China Journal of Pharmaceutical Economics 2020, 15:55-58.
[64]	Li D: Effect of Huatan Huoxue Formula on swollen joint count index and joint pain indexin patients with phlegm and blood stasis type of rheumatoid arthritis. J Medical Forum 2020, 41:91-94.
